# Supplementary material
Source: HighWire-hosted journal article supplement (http://www.ajevonline.org/highwire/filestream/9880/field_highwire_adjunct_files/0/Supplemental_Data.pdf)
Supplement: Supplemental_Data.pdf [file Supplemental_Data.pdf]

**Supplemental Data for:**

Londo JP and Kovaleski AP. 2017.

Characterization of wild North American grapevine cold hardiness using differential thermal analysis.

Am J Enol Vitic 68:203-212. doi: 10.5344/ajev.2016.16090.

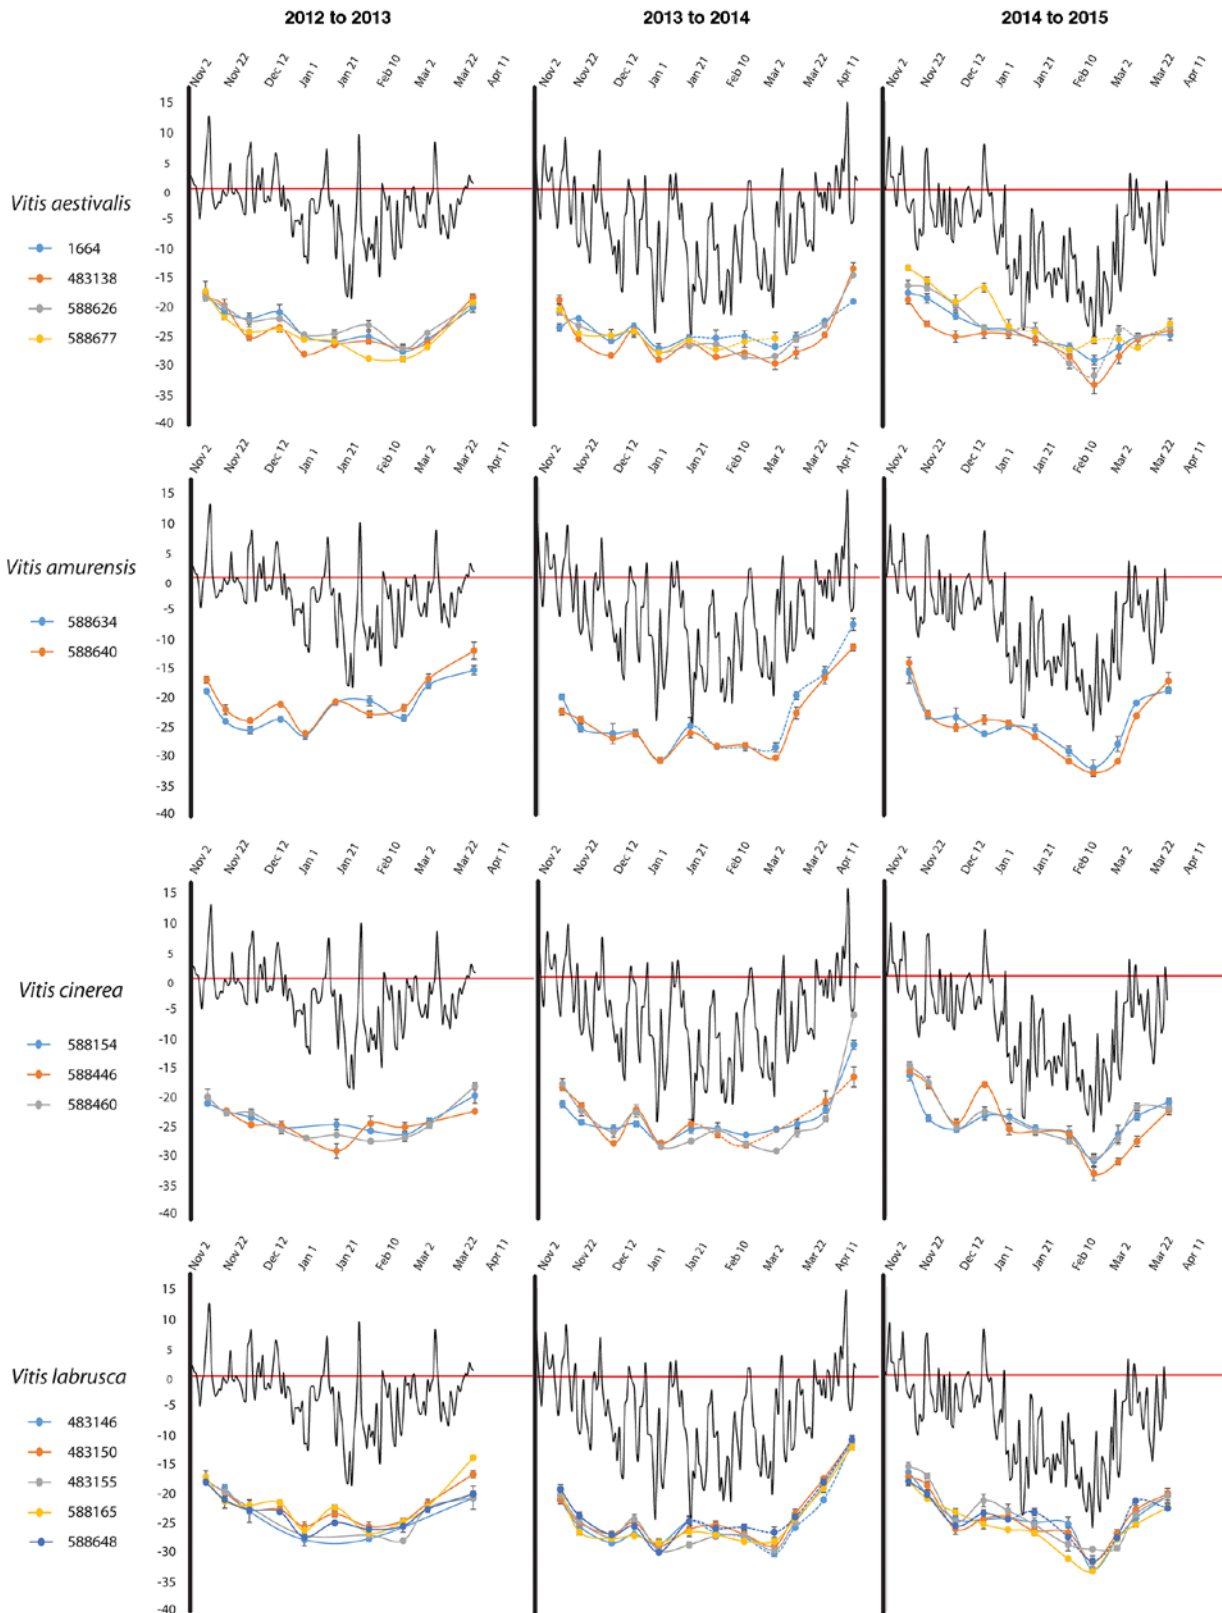

**Supplemental Figure 1** Low temperature exotherm (LTE) values for each genotype within species. LTE traces for each winter in the study shown for all genotypes. The x-axis displays time of winter starting 1 Nov and terminating at budburst each year. Black line indicates minimum daily temperatures, and red line indicates 0°C. Error bars are standard error measures. (Continued on page 2)

**Supplemental Data for:**

Londo JP and Kovaleski AP. 2017.

Characterization of wild North American grapevine cold hardiness using differential thermal analysis.

Am J Enol Vitic 68:203-212. doi: 10.5344/ajev.2016.16090.

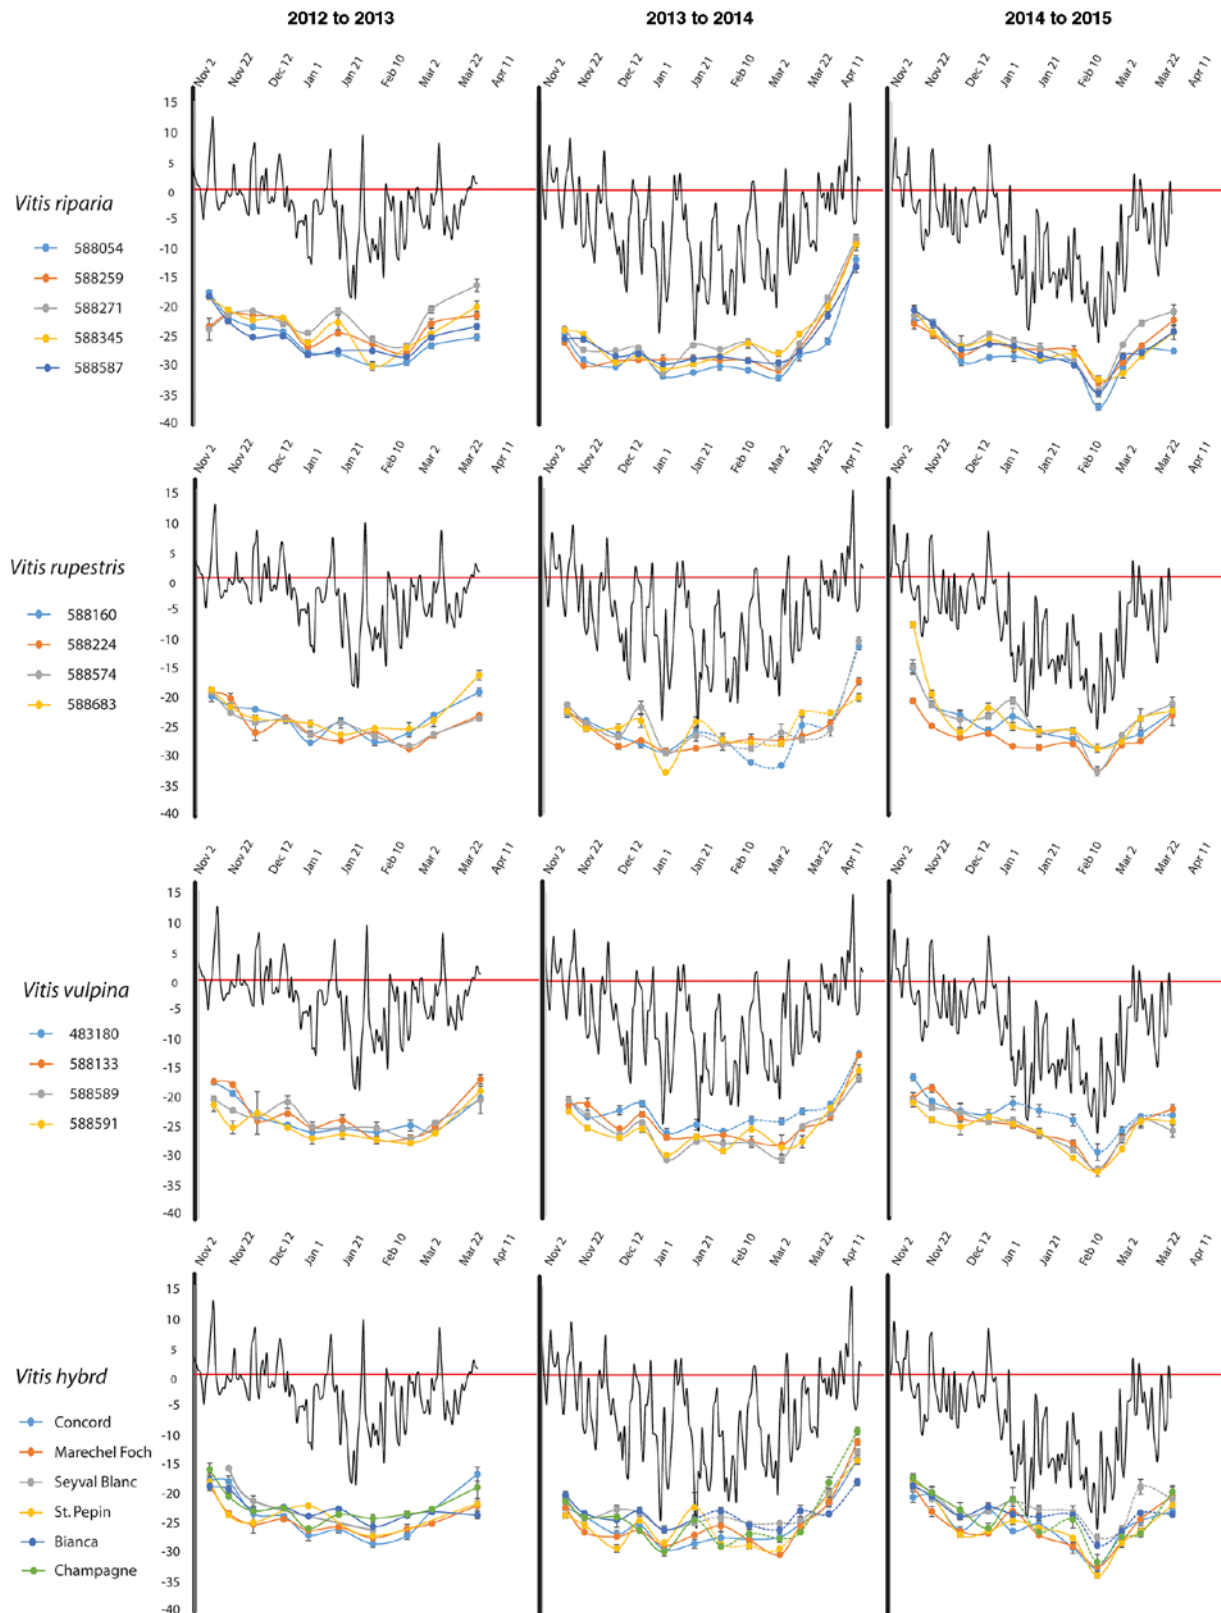

**Supplemental Figure 1** (Continued from page 1) Low temperature exotherm (LTE) values for each genotype within species. LTE traces for each winter in the study shown for all genotypes. The x-axis displays time of winter starting 1 Nov and terminating at budburst each year. Black line indicates minimum daily temperatures, and red line indicates 0°C. Error bars are standard error measures.

**Supplemental Data for:**

Londo JP and Kovaleski AP. 2017.

Characterization of wild North American grapevine cold hardiness using differential thermal analysis.

Am J Enol Vitic 68:203-212. doi: 10.5344/ajev.2016.16090.

---

---

**Supplemental Table 1** Estimates for parameters in a model describing low temperature exotherms for seven *Vitis* species in three different years using time (days) and the temperature index  $\sigma_T$  as coefficients.

| Species                 | Intercept | $\sigma_T$ | Time <sup>2</sup> | Time    | $\sigma_T$ :Time      | $\sigma_T$ :Time <sup>2</sup> |
|-------------------------|-----------|------------|-------------------|---------|-----------------------|-------------------------------|
| <b>Year 1</b>           |           |            |                   |         |                       |                               |
| <i>Vitis aestivalis</i> | -19.2     | 0.033      | 0.0009            | -0.1557 | $-6.9 \times 10^{-4}$ | $4.7 \times 10^{-6}$          |
| <i>V. amurensis</i>     | -20.5     | 0.046      | 0.0013            |         |                       |                               |
| <i>V. cinerea</i>       | -20.8     | 0.039      | 0.0010            |         |                       |                               |
| <i>V. labrusca</i>      | -19.1     | 0.038      | 0.0011            |         |                       |                               |
| <i>V. riparia</i>       | -19.4     | 0.037      | 0.0009            |         |                       |                               |
| <i>V. rupestris</i>     | -19.9     | 0.034      | 0.0009            |         |                       |                               |
| <i>V. vulpina</i>       | -19.0     | 0.034      | 0.0009            |         |                       |                               |
| <b>Year 2</b>           |           |            |                   |         |                       |                               |
| <i>Vitis aestivalis</i> | -21.6     | 0.033      | 0.0005            | -0.1557 | $-6.9 \times 10^{-4}$ | $4.7 \times 10^{-6}$          |
| <i>V. amurensis</i>     | -24.0     | 0.046      | 0.0008            |         |                       |                               |
| <i>V. cinerea</i>       | -21.4     | 0.039      | 0.0005            |         |                       |                               |
| <i>V. labrusca</i>      | -22.8     | 0.038      | 0.0007            |         |                       |                               |
| <i>V. riparia</i>       | -25.6     | 0.037      | 0.0008            |         |                       |                               |
| <i>V. rupestris</i>     | -23.7     | 0.034      | 0.0006            |         |                       |                               |
| <i>V. vulpina</i>       | -21.6     | 0.034      | 0.0006            |         |                       |                               |
| <b>Year 3</b>           |           |            |                   |         |                       |                               |
| <i>Vitis aestivalis</i> | -16.0     | 0.033      | 0.0007            | -0.1557 | $-6.9 \times 10^{-4}$ | $4.7 \times 10^{-6}$          |
| <i>V. amurensis</i>     | -19.2     | 0.046      | 0.0010            |         |                       |                               |
| <i>V. cinerea</i>       | -17.2     | 0.039      | 0.0009            |         |                       |                               |
| <i>V. labrusca</i>      | -17.8     | 0.038      | 0.0009            |         |                       |                               |
| <i>V. riparia</i>       | -20.9     | 0.037      | 0.0010            |         |                       |                               |
| <i>V. rupestris</i>     | -18.9     | 0.034      | 0.0009            |         |                       |                               |
| <i>V. vulpina</i>       | -17.9     | 0.034      | 0.0009            |         |                       |                               |

---
